# Supplementary material for: Regioselective synthesis of 1,4-disubstituted imidazoles
Source: Royal Society of Chemistry journal article supplement (doi:10.1039/c1ob06690k), 2011-12-15

## **Regioselective Synthesis of 1,4-Disubstituted Imidazoles**

*Chemical Development, Pharmaceutical Development, R&D, Bristol-Myers Squibb Company, 1 Squibb  
Drive, New Brunswick, New Jersey 08903*

*Michael.Schmidt@bms.com*

### **Table of Contents**

|                         |           |
|-------------------------|-----------|
| <u>Copy of Spectra:</u> | <u>S2</u> |
|-------------------------|-----------|

O=C1N(CCN1)C(=O)c2cnc(C3=CC=CC=C3Br)n2

VerticalScaleFactor = 1

CHLOROFORM-d

7.27

Normalized Intensity

1.00

0.75

0.50

0.25

0

0.88 0.99 2.00 2.02

2.02 6.09

Chemical Shift (ppm)

VerticalScaleFactor = 1

Normalized Intensity

Chemical Shift (ppm)

CHLOROFORM-d

| Chemical Shift (ppm) |
|----------------------|
| 162.20               |
| 139.06               |
| 135.58               |
| 134.03               |
| 133.21               |
| 123.95               |
| 123.08               |
| 121.83               |
| 77.00                |
| 67.12                |
| 47.27                |
| 42.98                |

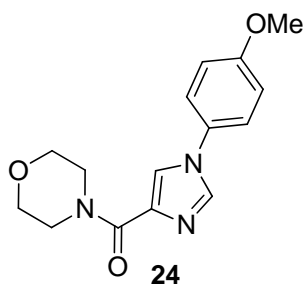

$^1\text{H}$  NMR:

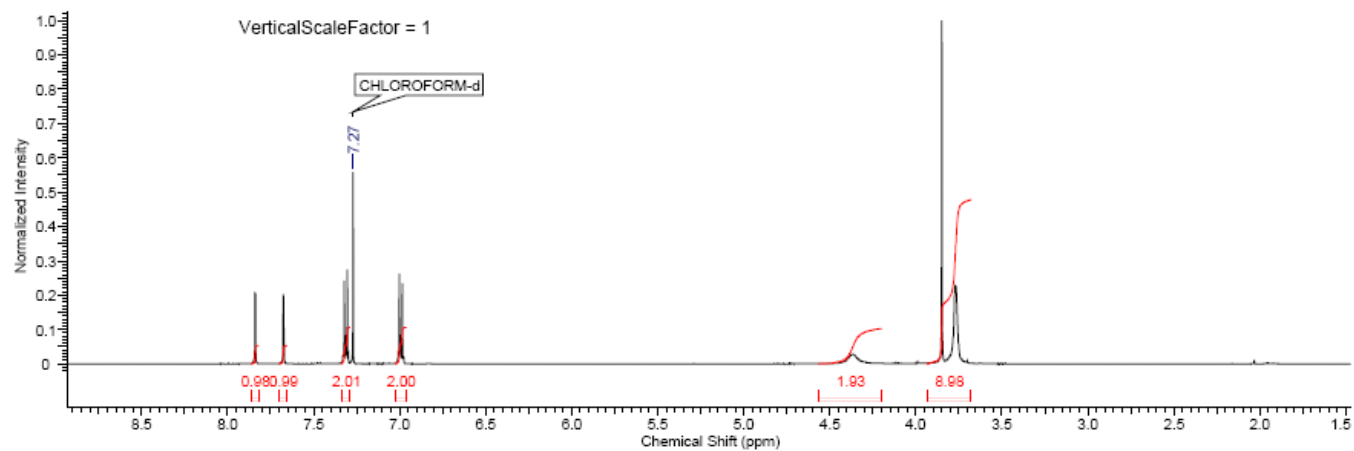

$^{13}\text{C}$  NMR:

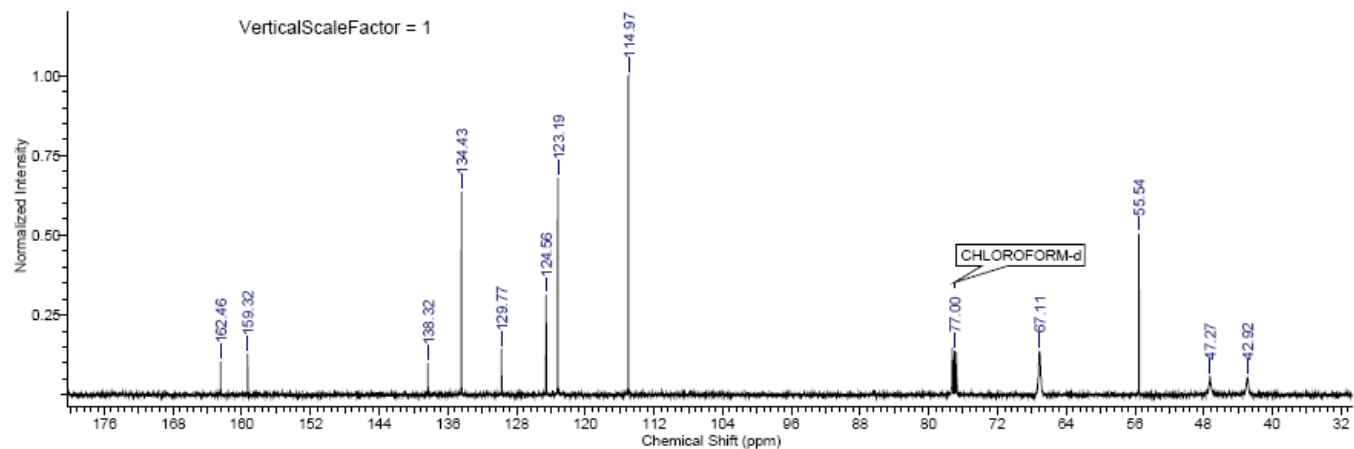

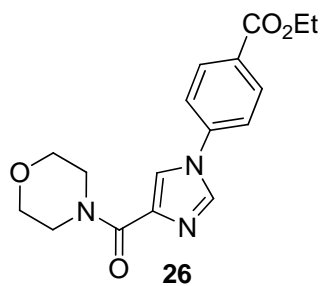

<sup>1</sup>H NMR:

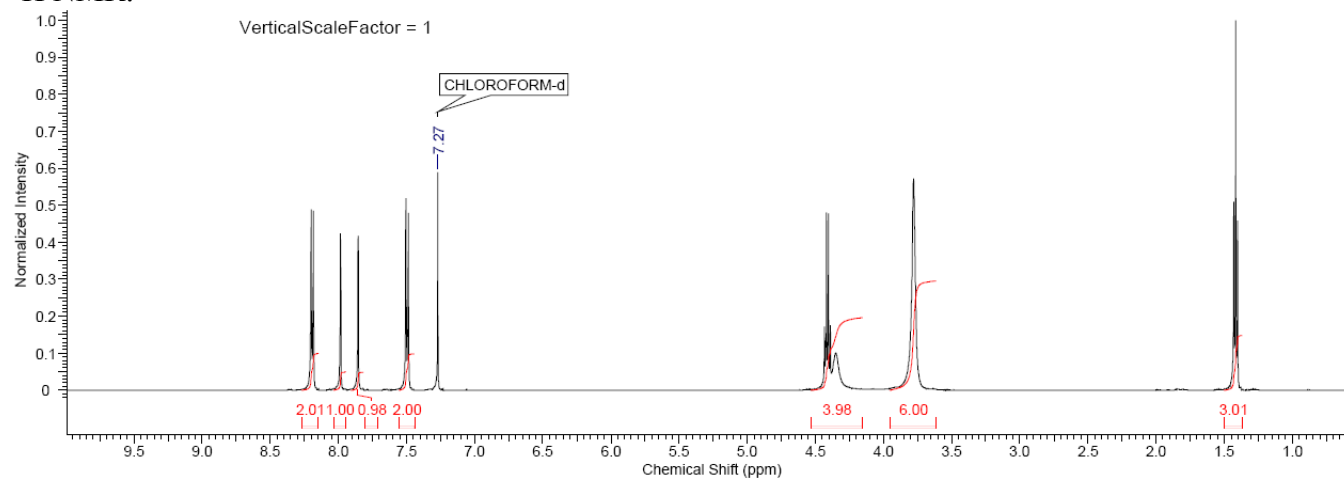

<sup>13</sup>C NMR:

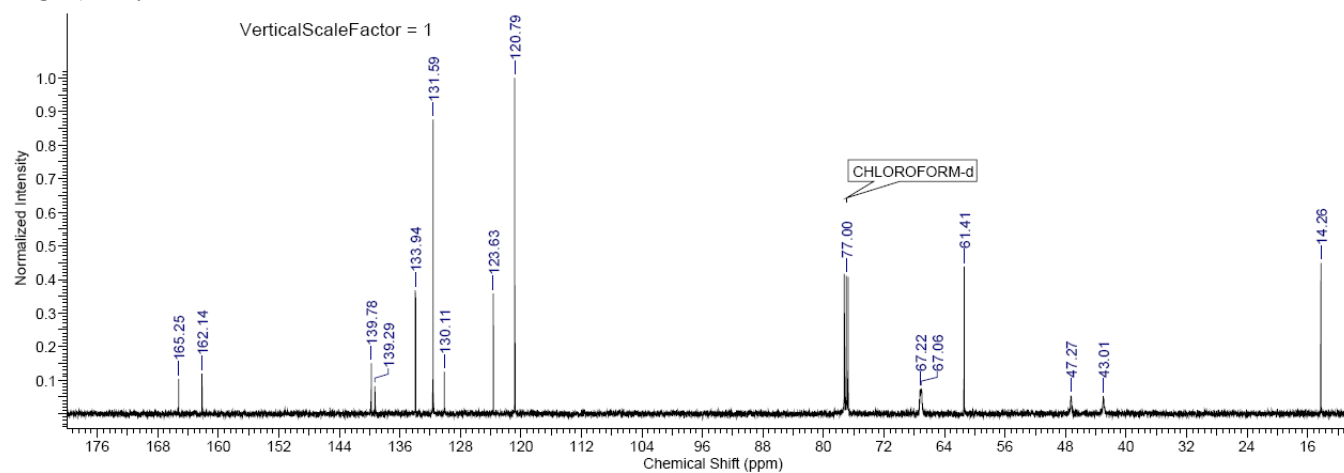

Regioselective Synthesis of 1,4-Disubstituted Imidazoles  
Michael Schmidt\* and Martin D. Eastgate

Page S5 / S16

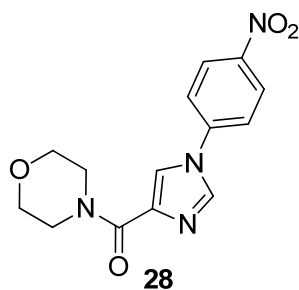

<sup>1</sup>H NMR:

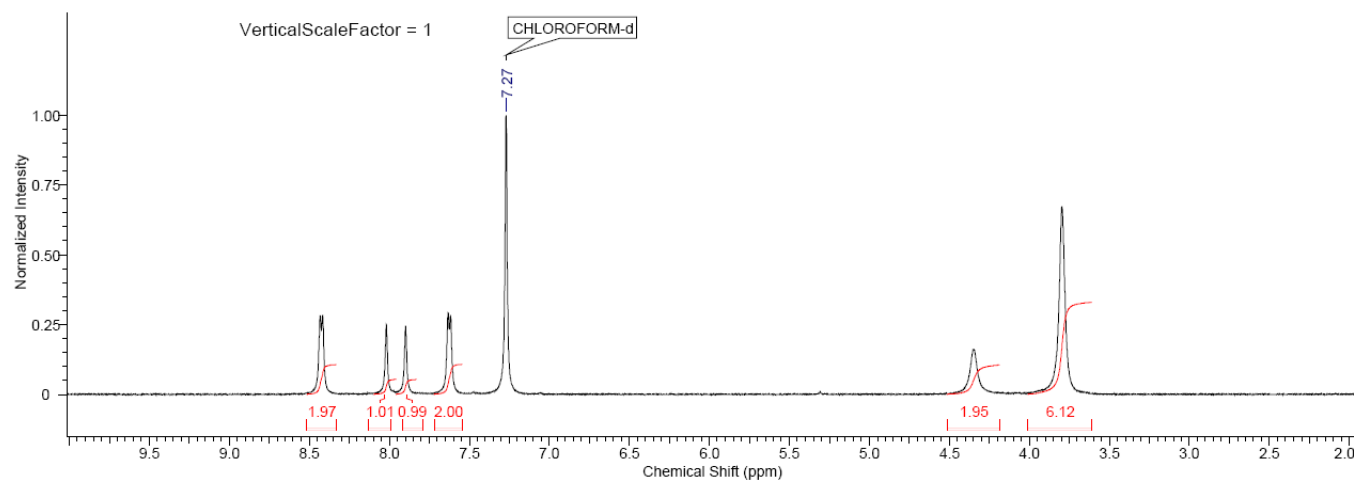

<sup>13</sup>C NMR:

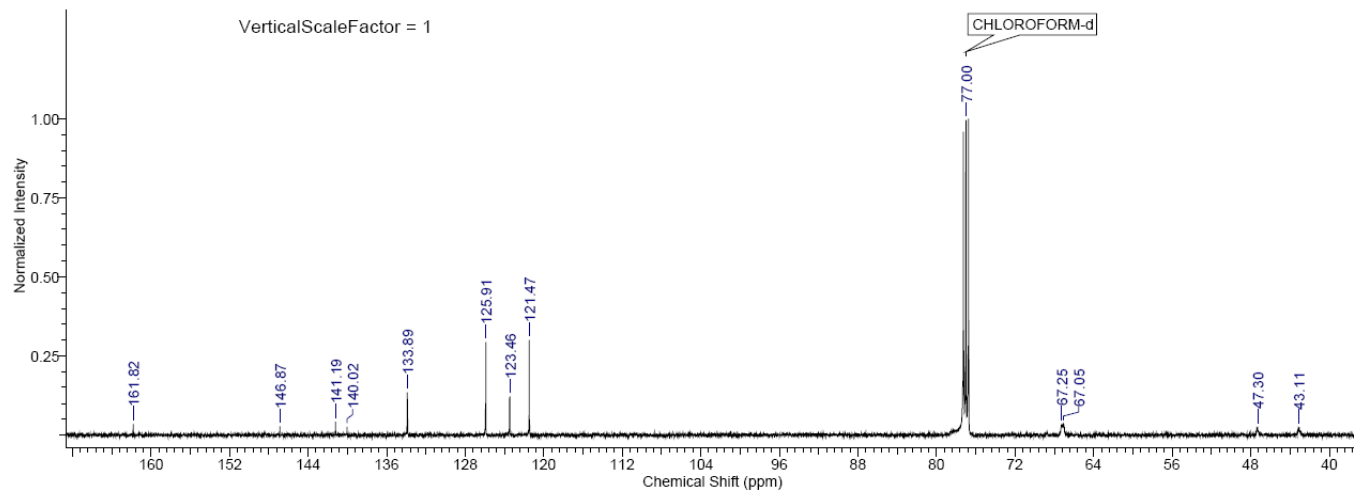

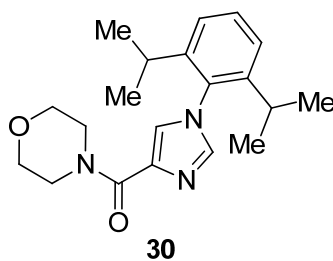

<sup>1</sup>H NMR:

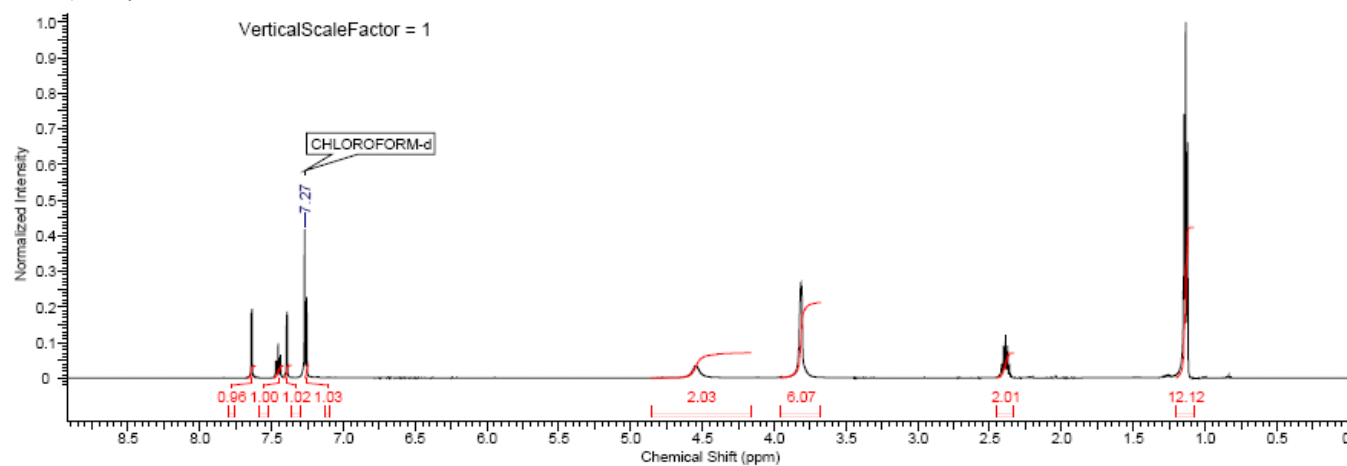

<sup>13</sup>C NMR:

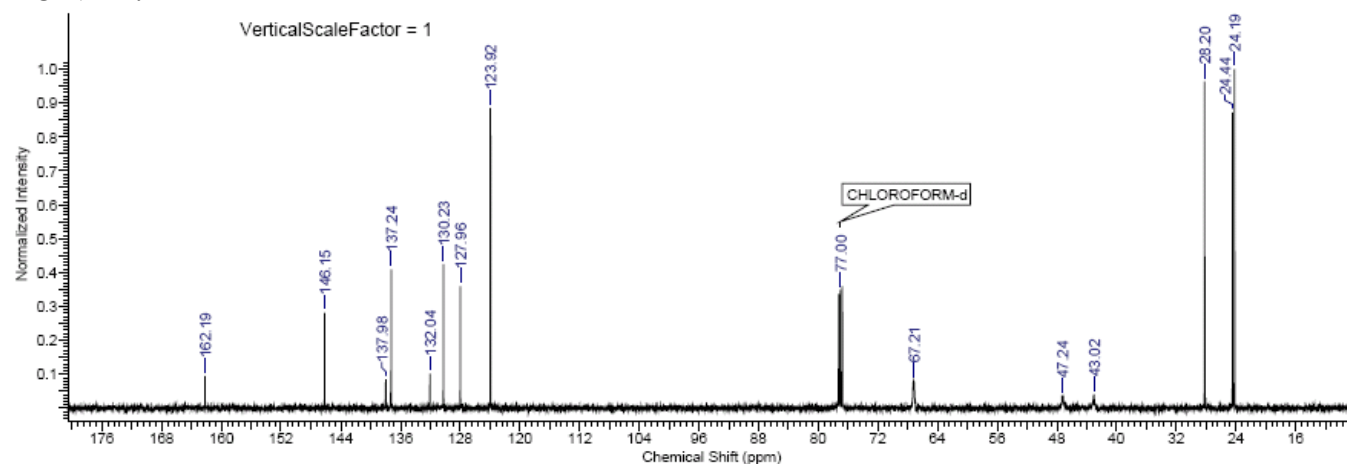

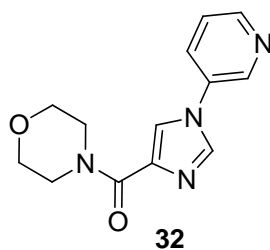

<sup>1</sup>H NMR:

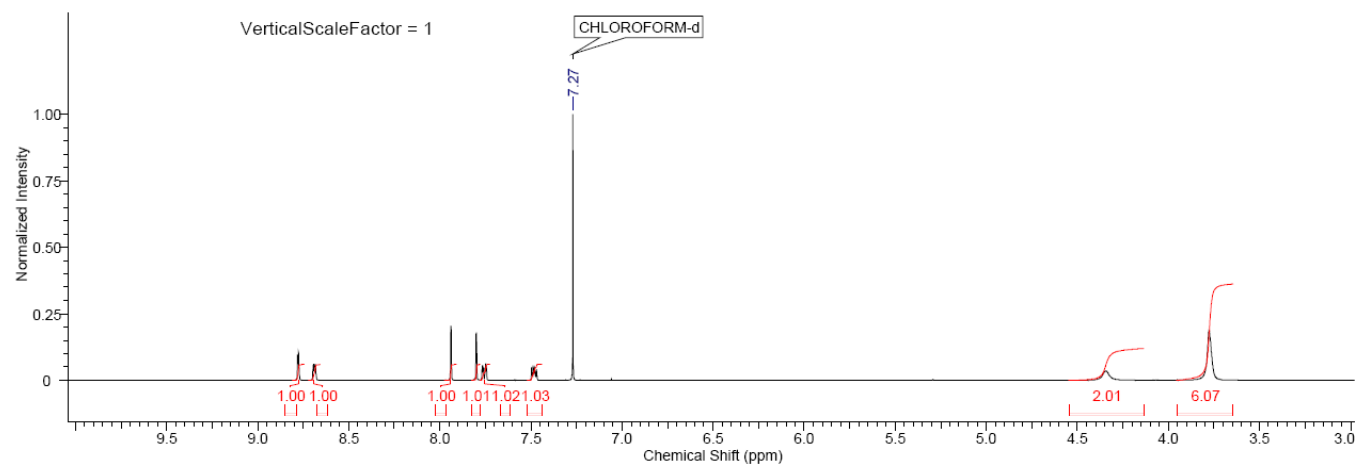

<sup>13</sup>C NMR:

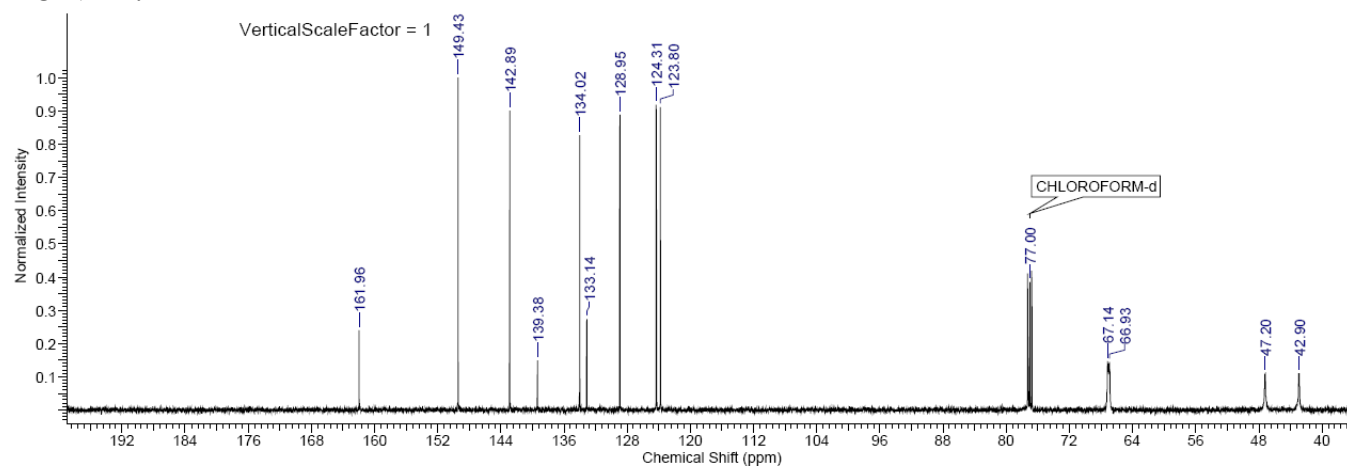

Regioselective Synthesis of 1,4-Disubstituted Imidazoles  
Michael Schmidt\* and Martin D. Eastgate

Page S8 / S16

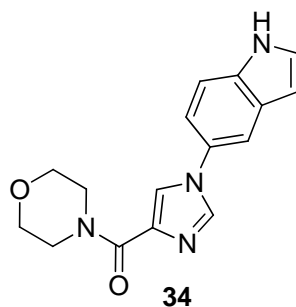

$^1\text{H}$  NMR:

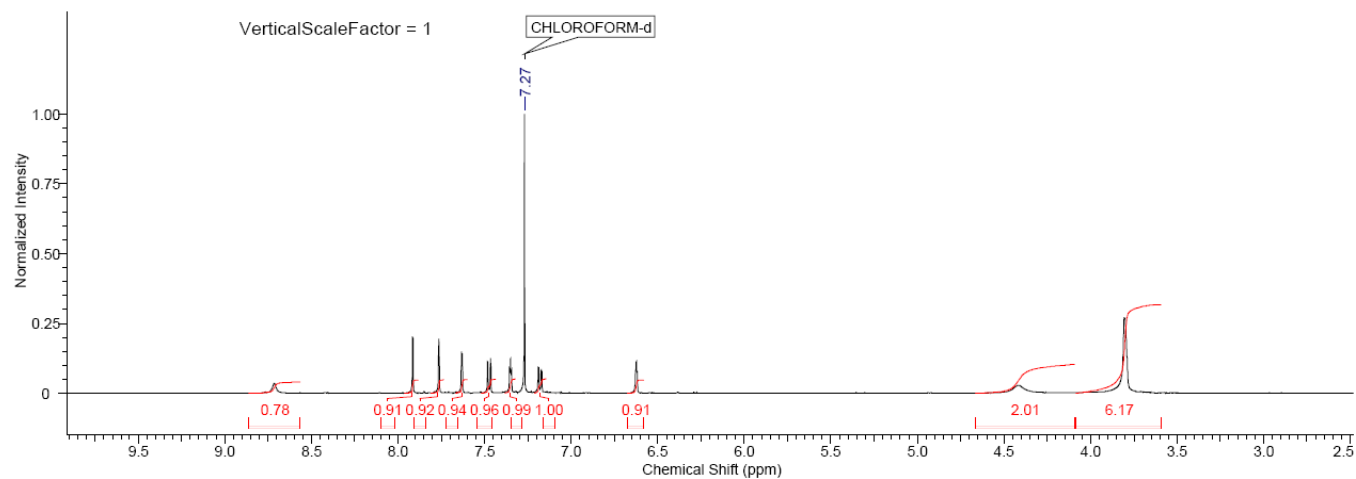

$^{13}\text{C}$  NMR (with expansion):

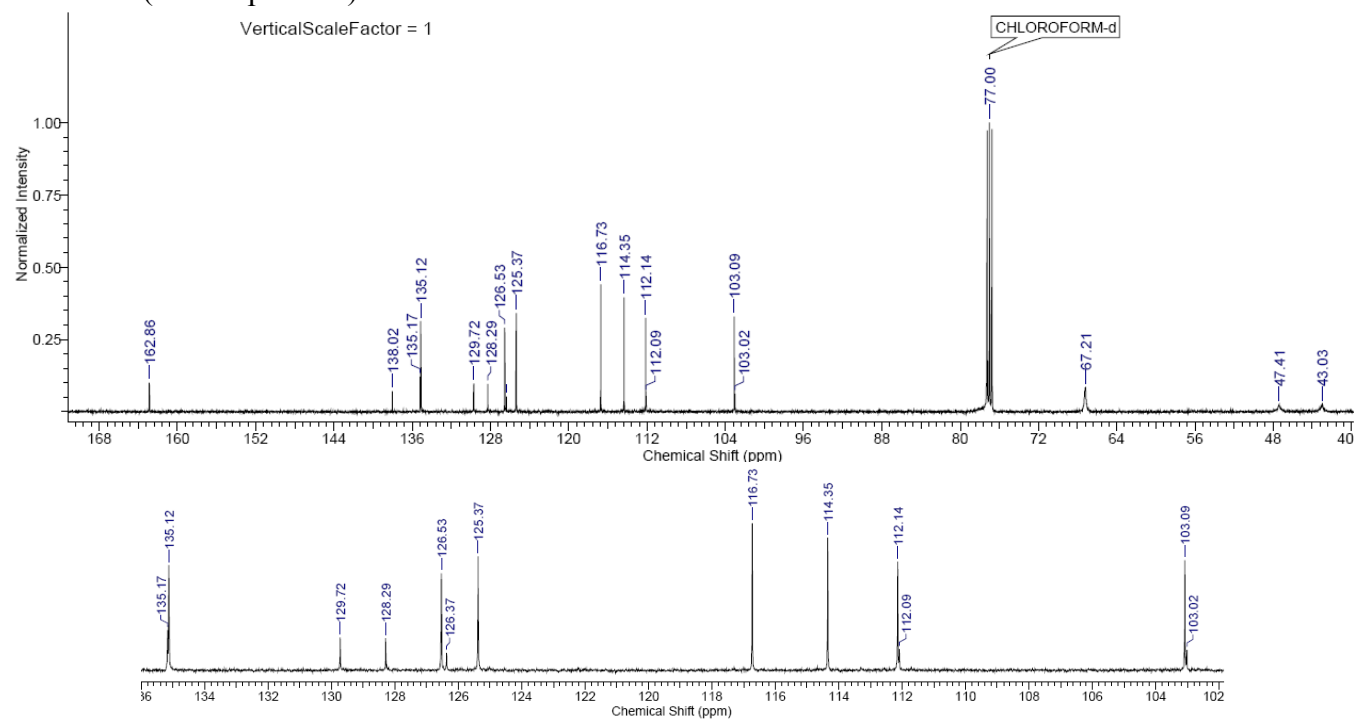



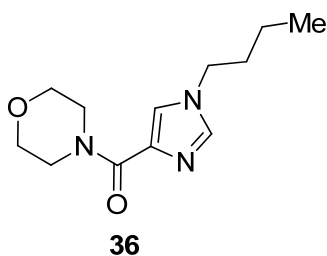

$^1\text{H}$  NMR:

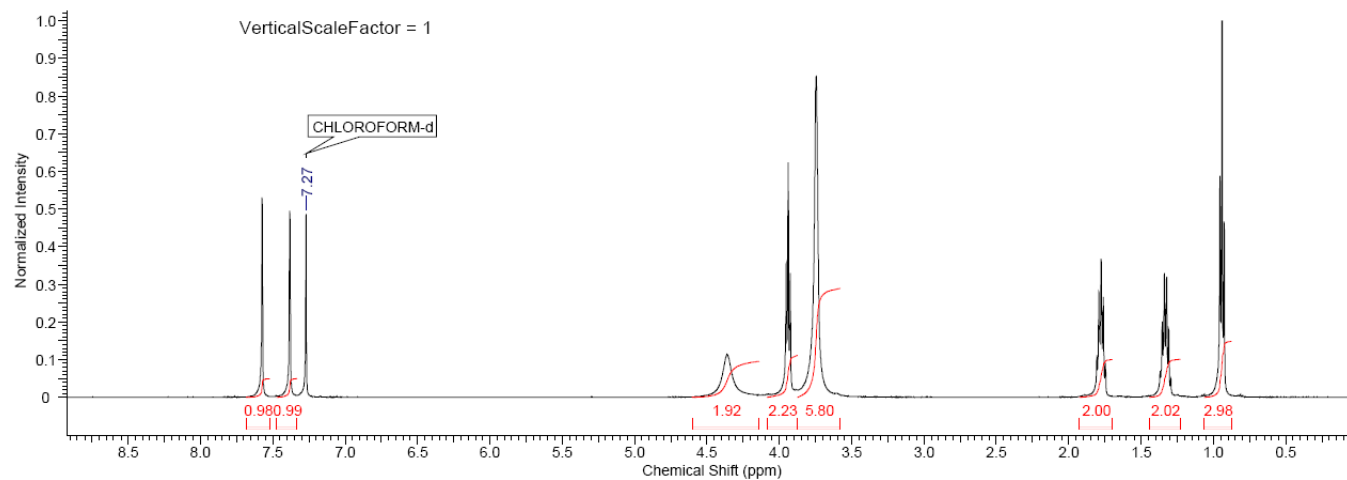

$^{13}\text{C}$  NMR:

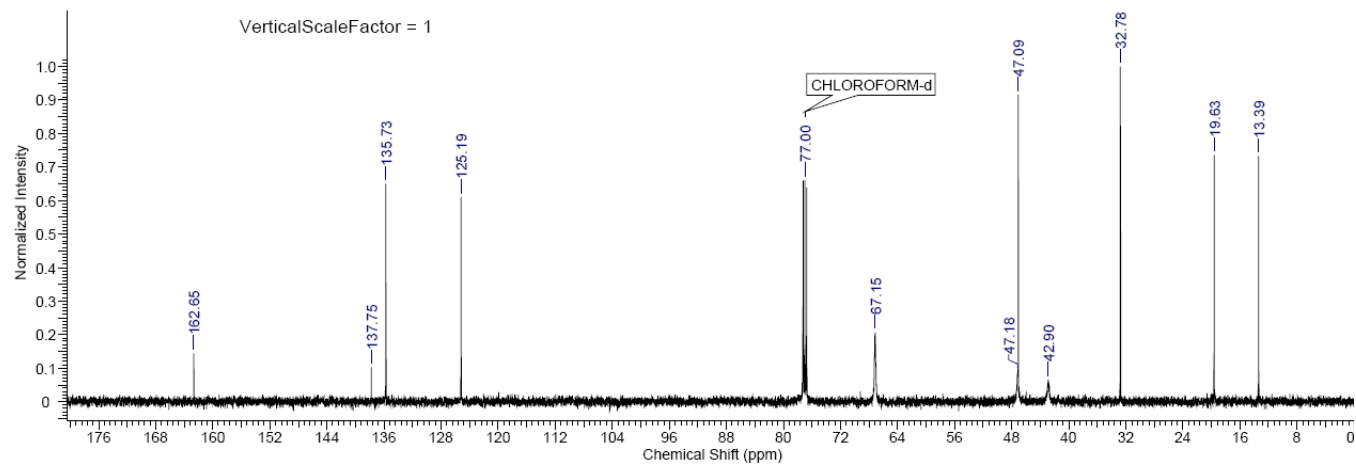

Regioselective Synthesis of 1,4-Disubstituted Imidazoles  
Michael Schmidt\* and Martin D. Eastgate

Page S10 / S16

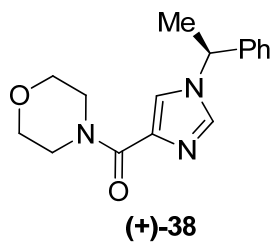

$^1\text{H}$  NMR:

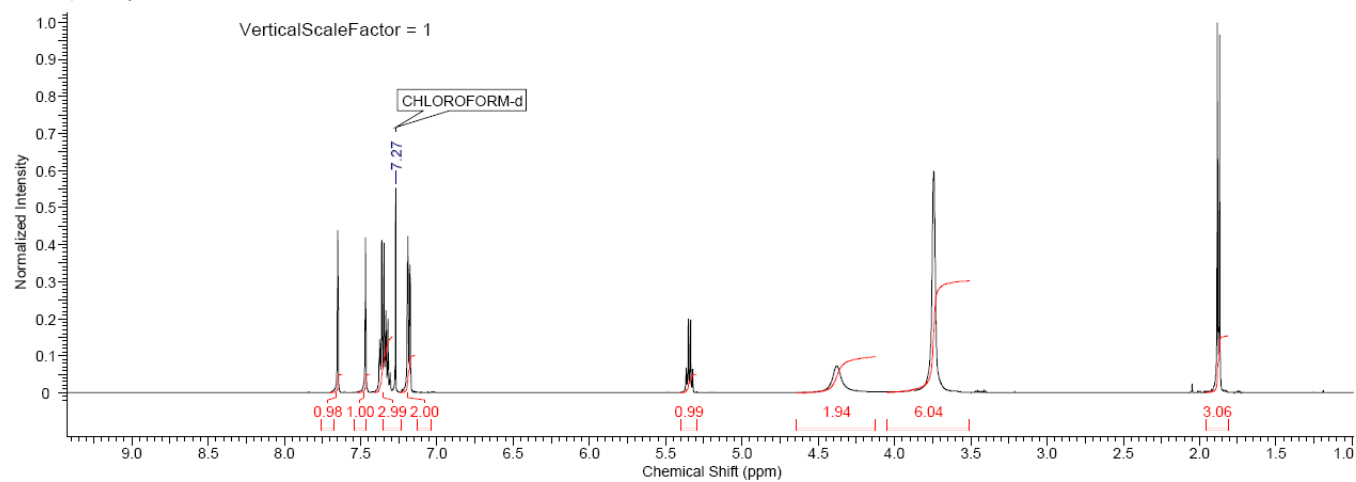

$^{13}\text{C}$  NMR:

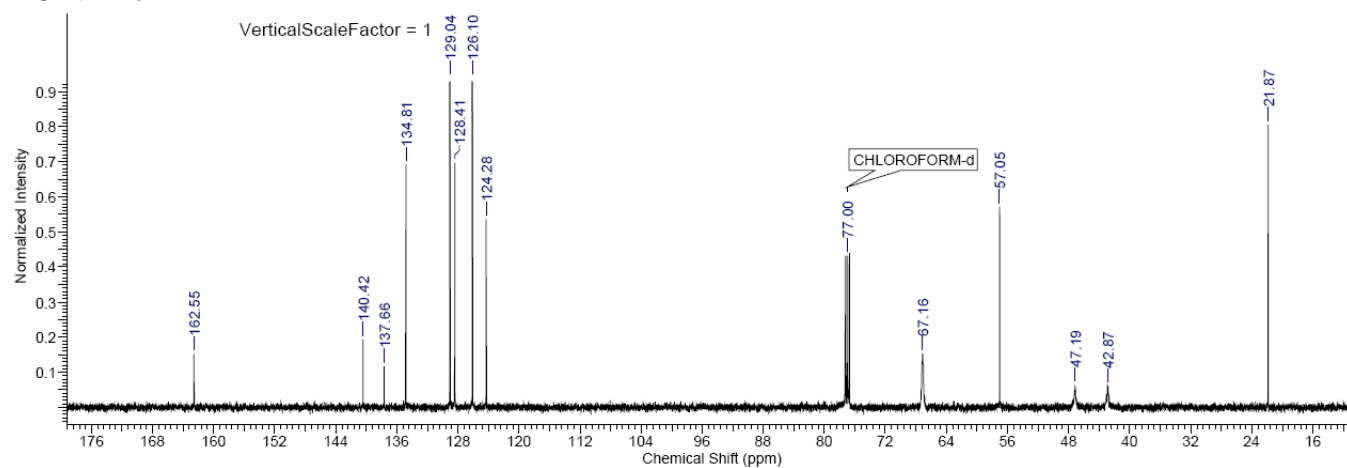

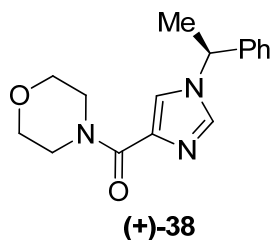

Mixture of Enantiomers:

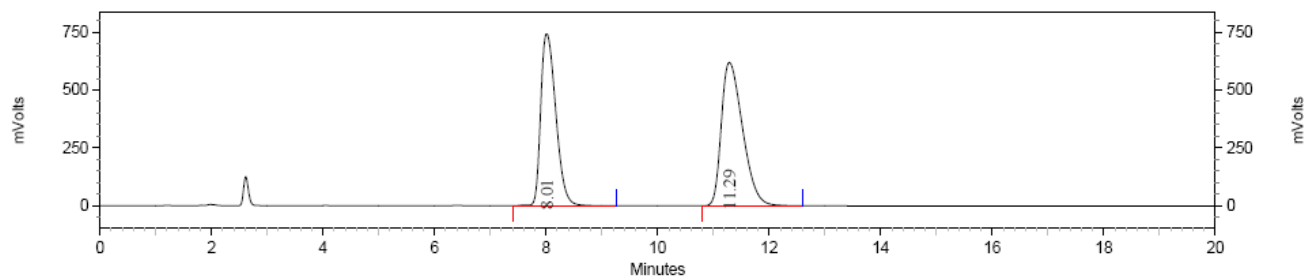

| UV1 Results |                |          |              |
|-------------|----------------|----------|--------------|
| Pk #        | Retention Time | Area     | Area Percent |
| 1           | 8.011          | 13949802 | 45.986       |
| 2           | 11.288         | 16385095 | 54.014       |
| Totals      |                | 30334897 | 100.000      |

Compound (+)-38:

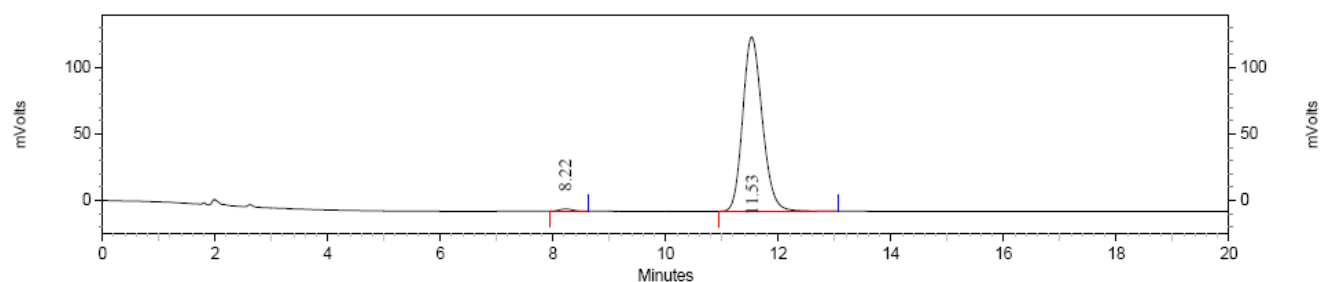

| UV1 Results |                |         |              |
|-------------|----------------|---------|--------------|
| Pk #        | Retention Time | Area    | Area Percent |
| 1           | 8.218          | 27658   | 0.863        |
| 2           | 11.528         | 3177223 | 99.137       |
| Totals      |                | 3204881 | 100.000      |

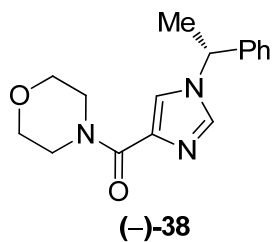

Compound (-)-38:

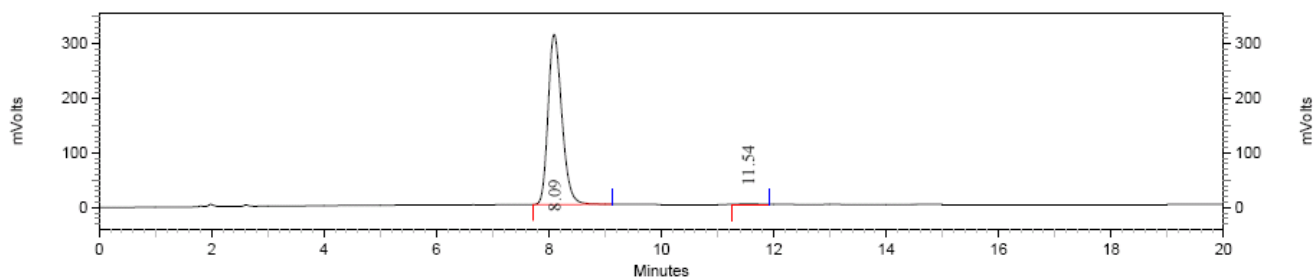

UV1 Results

| Pk #   | Retention Time | Area    | Area Percent |
|--------|----------------|---------|--------------|
| 1      | 8.093          | 5311247 | 99.578       |
| 2      | 11.543         | 22489   | 0.422        |
| Totals |                | 5333736 | 100.000      |

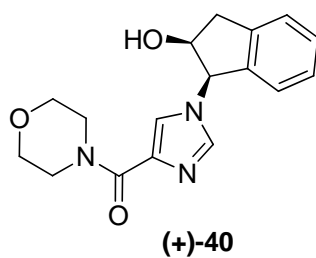

<sup>1</sup>H NMR:

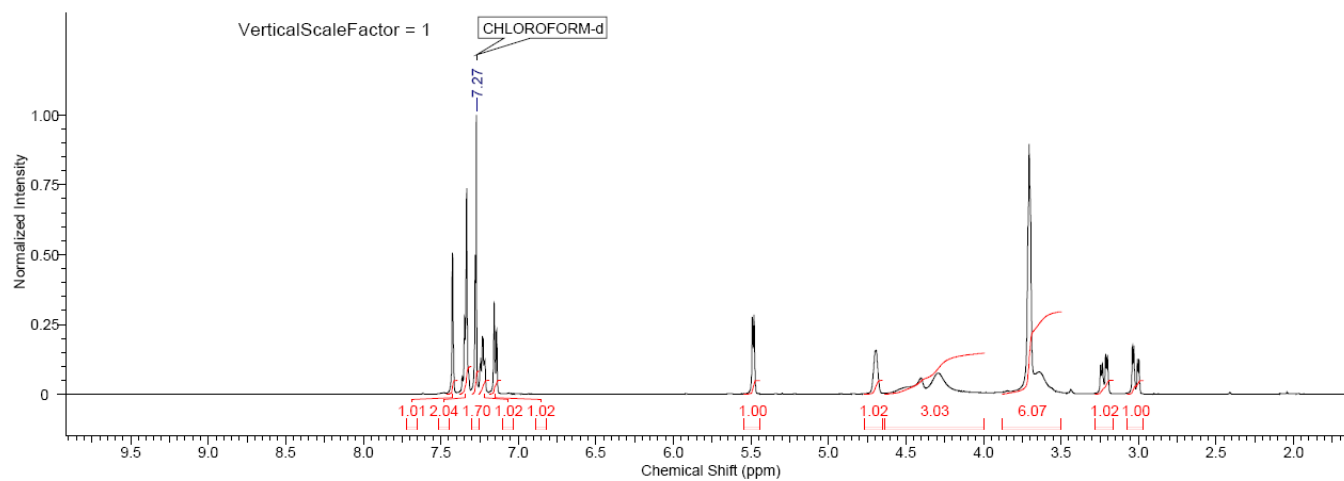

<sup>13</sup>C NMR:

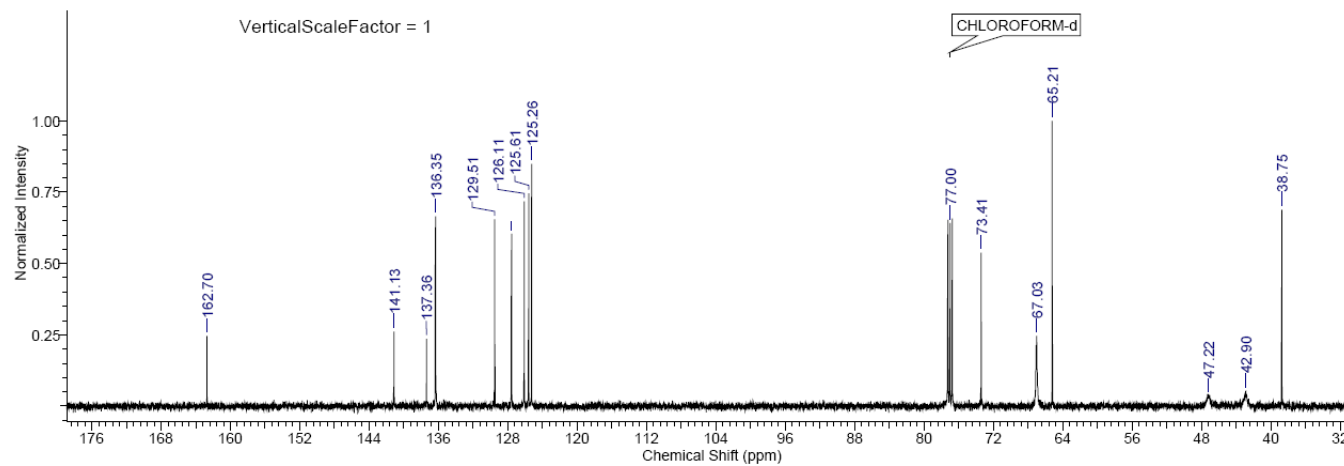

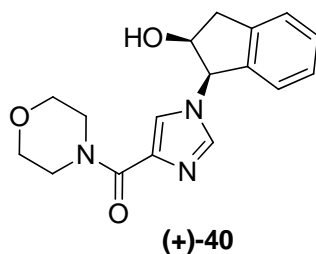

Mixture of Enantiomers:

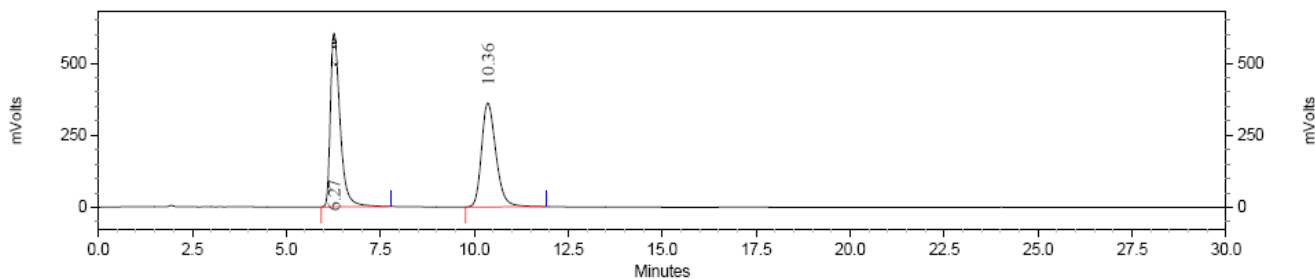

| UV1 Results |                |          |              |
|-------------|----------------|----------|--------------|
| Pk #        | Retention Time | Area     | Area Percent |
| 1           | 6.271          | 10792455 | 52.906       |
| 2           | 10.361         | 9606959  | 47.094       |
| Totals      |                | 20399414 | 100.000      |

Compound (+)-40:

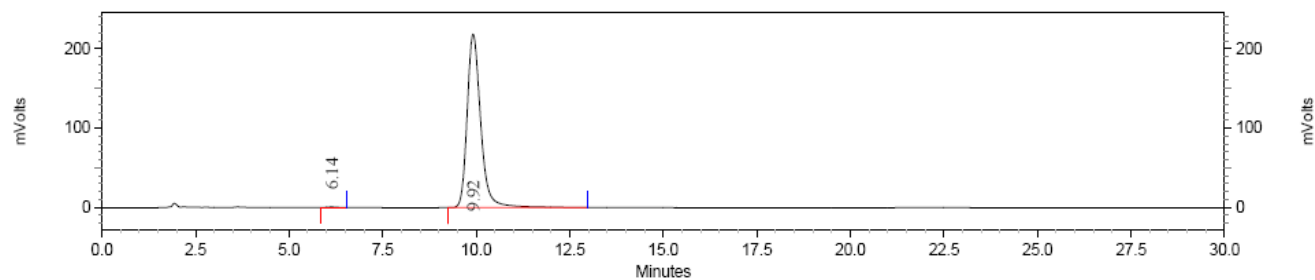

| UV1 Results |                |         |              |
|-------------|----------------|---------|--------------|
| Pk #        | Retention Time | Area    | Area Percent |
| 1           | 6.136          | 13438   | 0.242        |
| 2           | 9.919          | 5530116 | 99.758       |
| Totals      |                | 5543554 | 100.000      |

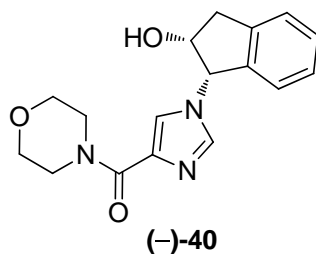

Compound **(-)-40**:

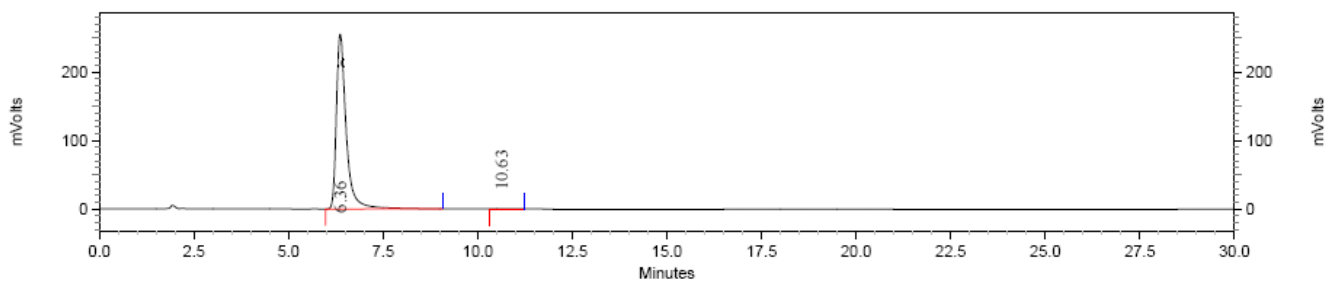

UVI Results

| Pk #   | Retention Time | Area    | Area Percent |
|--------|----------------|---------|--------------|
| 1      | 6.363          | 4636953 | 99.836       |
| 2      | 10.629         | 7637    | 0.164        |
| Totals |                | 4644590 | 100.000      |

Regioselective Synthesis of 1,4-Disubstituted Imidazoles  
Michael Schmidt\* and Martin D. Eastgate

Page S16 / S16

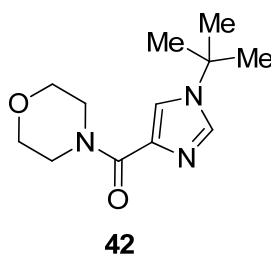

$^1\text{H}$  NMR:

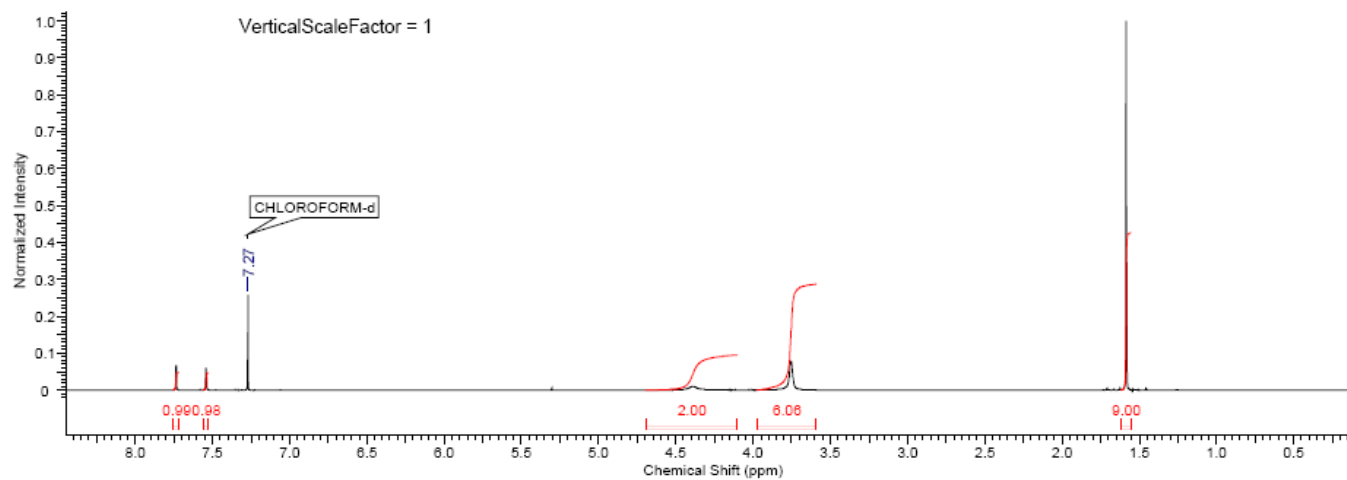

$^{13}\text{C}$  NMR:

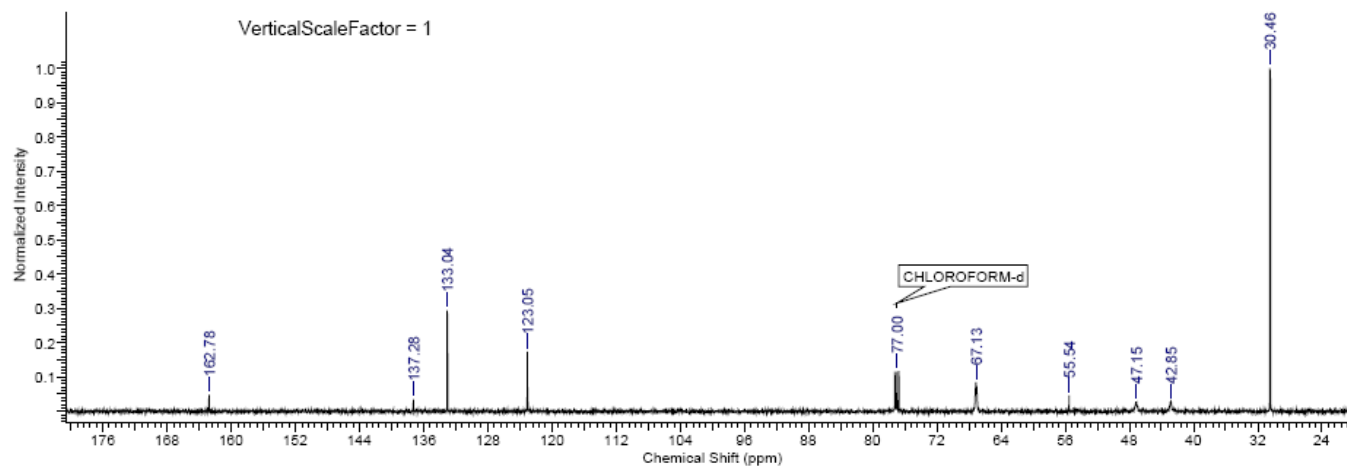

Supplement: c1ob06690k.pdf [file c1ob06690k.pdf]
